# Supplementary material
Source: PubMed Central journal article supplement (PMC3263940)
Supplement: supp_111.041467_SupplementaryMaterialsfinal.pdf [file supp_111.041467_SupplementaryMaterialsfinal.pdf]

# UGT1A9-overexpressing HeLa Cells Is an Appropriate Tool to Delineate the Kinetic Interplay between BCRP and UGT and to Rapidly Identify the Glucuronide Substrates of BCRP

Wen Jiang, Beibei Xu, Baojian Wu, Rong Yu, Ming Hu

Drug Metabolism and Disposition

Fig.1S

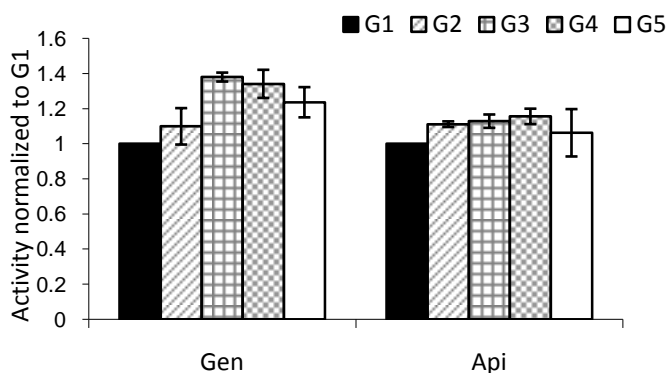

**Fig.1S Stability of expressed UGT1A9 in engineered (or stably transfected) HeLa cells.** Genistein (Gen) or apigenin (Api) (10 $\mu$ M) were incubated with engineered HeLa cells grown on 6-well plates for five consecutive generations. Each cell generation was marked by a cell passage every 4 days. The activities were all normalized to the first generation. Each data point was the average of three determinations with error bar representing the standard deviation (n=3).

**Fig.2S**

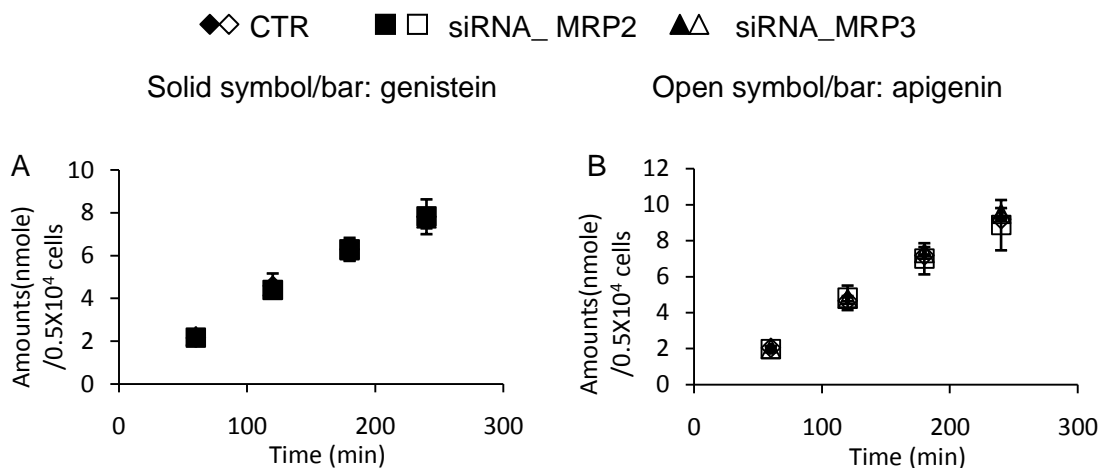

**Fig.2S Effects of siRNA-mediated MRP2/MRP3 silencing on the excretion of glucuronides.** Genistein (A) or apigenin (B) ( $10\mu\text{M}$ ) were incubated with engineered HeLa cells in the presence or absence of siRNA of MRP2 or MRP3 ( $40\text{pmole/well}$  of a 12 well-plate) at  $37^\circ\text{C}$ . The incubating media were taken at 60, 120, 180 and 240min. Each data point was the average of three determinations with error bar representing the standard deviation ( $n=3$ ).  $p<0.05$ , \*

**Fig.3S**

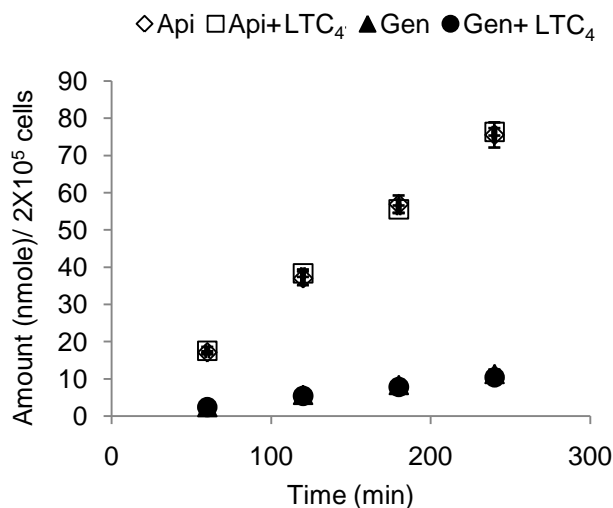

**Fig.3S Effects of LTC<sub>4</sub> ( $0.1\mu\text{M}$ ) on the excretion of glucuronides.** Genistein (Gen) or apigenin (Api) ( $10\mu\text{M}$ ) were incubated with engineered HeLa cells grown on 6-well plates in the presence or absence of LTC<sub>4</sub> at  $37^\circ\text{C}$ . The incubating media were taken at 60, 120, 180 and 240min. Each data point was the average of three determinations with error bar representing the standard deviation ( $n=3$ ).  $P<0.05$ , \*
